# Supplementary material for: Sequential determination of calcium chemical phases in gypsum-associated fluorite ores using ICP-OES
Source: Royal Society of Chemistry journal article supplement (doi:10.1039/d5ra07208e), 2026-01-01
Supplement: d5ra07208e1.xlsx [file d5ra07208e1.xlsx]

## Sheet: Single-factor-Sodium chloride
		*3.40			*2.5			*1.95
Sodium chloride concentration	Ca	CaSO4		Ca	CaCO3		Ca	CaF2
g/mL	%	%		%	%		%	%
0.1	24.1852	82.2297		0.0842	0.2105		0.0769	0.149955
0.12	25.632	87.1488		0.092	0.23		0.0667	0.130065
0.14	27.1264	92.2298		0.1013	0.25325		0.07179	0.13999
0.16	28.1029	95.5499		0.0965	0.24125		0.0564	0.10998
0.18	28.9001	98.2603		0.1044	0.261		0.06667	0.130006
0.2	29.241	99.4194		0.1083	0.27075		0.0615	0.119925
0.22	29.232	99.3888		0.1121	0.28025		0.07179	0.13999
0.24	28.87	98.158		0.112	0.28		0.0666667	0.13
0.26	27.72	94.248		0.1082	0.2705		0.0719	0.140205
Times	Ca	CaSO4		Ca	CaCO3		Ca	CaF2
mins	%	%		%	%		%	%
15	19.185	65.229		0.0643	0.16075		0.0512	0.09984
20	22.691	77.1494		0.0646	0.1615		0.0564	0.10998
25	25.067	85.2278		0.0762	0.1905		0.0512	0.09984
30	27.22	92.548		0.0848	0.212		0.0615	0.119925
35	28.723	97.6582		0.0842	0.2105		0.06667	0.130006
40	29.247	99.4398		0.0921	0.23025		0.0615	0.119925
45	29.244	99.4296		0.0924	0.231		0.06667	0.130006
50	29.253	99.4602		0.0881	0.22025		0.0617	0.120315

## Sheet: Single-factor-Hydrochloric acid
		*2.5			*1.95
Hydrochloric acid concentration	Ca	CaCO3		Ca	CaF2
%	%	%		%	%
5	34.048	85.12		0.0666	0.12987
6	36.142	90.355		0.0871	0.169845
7	37.82	94.55		0.0974	0.18993
8	39.06	97.65		0.1128	0.21996
9	39.704	99.26		0.1179	0.229905
10	39.888	99.72		0.1179	0.229905
11	39.916	99.79		0.123	0.23985
12	39.932	99.83		0.118	0.2301
13	39.912	99.78		0.128	0.2496
Times	Ca	CaCO3		Ca	CaF2
mins	%	%		%	%
18	33.704	84.26		0.0564	0.10998
20	36.048	90.12		0.0667	0.130065
22	37.264	93.16		0.082	0.1599
24	38.1	95.25		0.0974	0.18993
26	39.024	97.56		0.1077	0.210015
28	39.792	99.48		0.1128	0.21996
30	39.896	99.74		0.1179	0.229905
32	39.916	99.79		0.1179	0.229905
34	39.968	99.92		0.1231	0.240045

## Sheet: Single-factor-Boric acid
		*1.95
Boric acid concentration	Ca	CaF2
%	%	%
0.01	37.0512	72.2498
0.015	41.2153	80.3698
0.02	44.0718	85.94
0.025	47.1538	91.9499
0.03	49.4564	96.44
0.035	50.641	98.7499
0.04	50.841	99.1399
0.045	50.8878	99.2312
0.05	50.8615	99.1799
Times	Ca	CaF2
mins	%	%
20	46.2154	90.12
22	47.7744	93.1601
24	48.8461	95.2499
26	50.0307	97.5599
28	51.0154	99.48
30	51.1487	99.74
32	51.1743	99.7899
34	51.241	99.92

## Sheet: Precision
		*3.40		*2.5		*1.95
	Ca	CaSO4	Ca	CaCO3	Ca	CaF2
	%	%	%	%	%	%
XS1-1	2.48	8.432	0.71	1.775	20.26	39.507
XS1-2	2.52	8.568	0.72	1.8	19.98	38.961
XS1-3	2.49	8.466	0.64	1.6	20.12	39.234
XS1-4	2.59	8.806	0.73	1.825	20.33	39.6435
XS1-5	2.43	8.262	0.7	1.75	19.94	38.883
XS1-6	2.54	8.636	0.68	1.7	20.22	39.429
XS1-7	2.49	8.466	0.74	1.85	20.06	39.117
AVG	2.50571	8.51943	0.702857	1.75714	20.13	39.2535
Average deviation		0.904		0.44		1.6345
SD		0.172092		0.085042		0.285482
RSD		2.01999		4.83979		0.727279
XS2-1	8.89	30.226	2.54	6.35	7.93	15.4635
XS2-2	8.72	29.648	2.42	6.05	7.96	15.522
XS2-3	8.83	30.022	2.43	6.075	7.92	15.444
XS2-4	8.63	29.342	2.51	6.275	7.88	15.366
XS2-5	8.81	29.954	2.42	6.05	7.97	15.5415
XS2-6	8.79	29.886	2.56	6.4	7.81	15.2295
XS2-7	8.67	29.478	2.4	6	7.83	15.2685
AVG	8.76286	29.7937	2.46857	6.17143	7.9	15.405
Average deviation		1.83		1.02		0.697
SD		0.315739		0.164841		0.121256
RSD		1.05975		2.67104		0.787121
XS3-1	4.92	16.728	3.98	9.95	13.41	26.1495
XS3-2	4.84	16.456	4.05	10.125	13.45	26.2275
XS3-3	4.93	16.762	3.93	9.825	13.56	26.442
XS3-4	4.96	16.864	4.01	10.025	13.41	26.1495
XS3-5	4.82	16.388	4.06	10.15	13.56	26.442
XS3-6	4.88	16.592	4.01	10.025	13.5	26.325
XS3-7	4.91	16.694	3.95	9.875	13.36	26.052
AVG	4.89429	16.6406	3.99857	9.99643	13.4643	26.2554
Average deviation		0.972		0.675		0.8905
SD		0.170969		0.121131		0.15224
RSD		1.02742		1.21174		0.579845

## Sheet: Detection limit
		*3.40		*2.5		*1.95
	Ca	CaSO4	Ca	CaCO3	Ca	CaF2
	%		%		%
kb1	0.0147	0.04998	0.0079	0.01975	0.0121	0.023595
kb2	0.0162	0.05508	0.0073	0.01825	0.0101	0.019695
kb3	0.0145	0.0493	0.0072	0.018	0.0097	0.018915
kb4	0.0152	0.05168	0.0085	0.02125	0.0109	0.021255
kb5	0.0164	0.05576	0.0096	0.024	0.0114	0.02223
kb6	0.0158	0.05372	0.0068	0.017	0.0112	0.02184
kb7	0.0141	0.04794	0.0071	0.01775	0.0112	0.02184
kb8	0.0159	0.05406	0.0076	0.019	0.0093	0.018135
kb9	0.0166	0.05644	0.0075	0.01875	0.0115	0.022425
kb10	0.0163	0.05542	0.0084	0.021	0.0112	0.02184
kb11	0.0145	0.0493	0.0072	0.018	0.0104	0.02028
S		0.00305656		0.00203799		0.0016473
LOD		0.00916969		0.00611397		0.0049419
LOQ		0.0366788		0.0244559		0.0197676

## Sheet: Mass Balance
	Total Calcium	Calcium sulphate Phase	Calcium Carbonate Phase	Calcium Fluoride Phase	Sum of Calcium Content in Each Phase State	Deviation
	%	%	%	%	%	%
XS1	23.88	2.51	0.704	20.14	23.35	-2.21943
XS2	19.87	8.83	2.46	7.95	19.24	-3.17061
XS3	22.18	4.9	3.96	13.43	22.29	0.495942

## Sheet: Standard recovery rate
Sample	Chemical phase state	Content of fluorine (mg)			Recovery (%)
		Measured	Added	Measured after added
XS1	Calcium sulphate phase	16.9	20	35.6	93.5
	Calcium carbonate phase	3.56	10	12.9	93.4
	Calcium fluoride phase	78.1	40	115	92.3
XS2	Calcium sulphate phase	60.2	20	78.3	90.5
	Calcium carbonate phase	11.8	10	21.6	98
	Calcium fluoride phase	31.2	40	70.3	97.8
XS3	Calcium sulphate phase	32.3	20	51.5	96
	Calcium carbonate phase	20.8	10	29.9	91
	Calcium fluoride phase	52.4	40	91.6	91
